# Supplementary material for: Cyclam (1,4,8,11-tetraazacyclotetradecane) with one methylphosphonate pendant arm: a new ligand for selective copper(ii) binding
Source: Royal Society of Chemistry journal article supplement (doi:10.1039/b507062g), 2005-01-01

## Supplementary Materials

for

### Cyclam (1,4,8,11-tetraazacyclotetradecane) with one methylphosphonate pendant arm: a new ligand for selective copper(II) binding

Silvia Fůzerová,<sup>a</sup> Jan Kotek,<sup>a</sup> Ivana Císarová,<sup>a</sup> Petr Hermann,<sup>\*a</sup> Koen Binnemans<sup>b</sup> and Ivan Lukeš<sup>a</sup>

<sup>a</sup> Department of Inorganic Chemistry, Universita Karlova (Charles University), Hlavova 2030, Prague 2, 128 40, Czech Republic. Fax: +420-22195-1253; Tel: +420-22195-1263; E-mail:

[petrh@natur.cuni.cz](mailto:petrh@natur.cuni.cz)

<sup>b</sup> Laboratory of Coordination Chemistry, Department of Chemistry, Katholieke Universiteit Leuven, Celestijnenlaan 200F, B-3001 Leuven, Belgium.

**Figure S1**

Distribution diagram of H<sub>2</sub>te1P

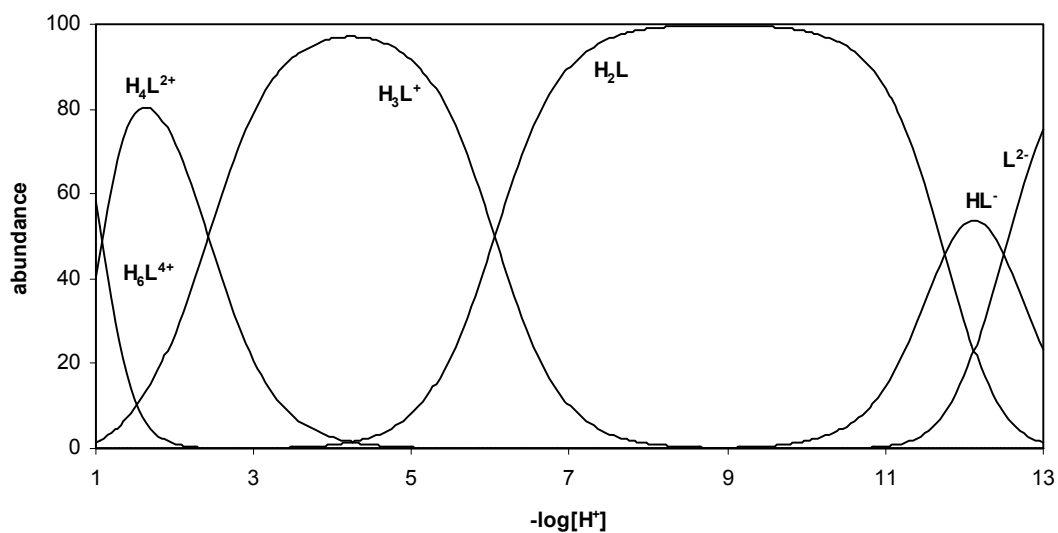

Supplement: b507062g.pdf [file b507062g.pdf]
